# Supplementary material
Source: Springer Nature journal article supplement (https://www.springermedizin.de/resource/supplementary/12875_2005_139_MOESM3_ESM.pdf/9436514)

### a) Variation in respondents by professional area

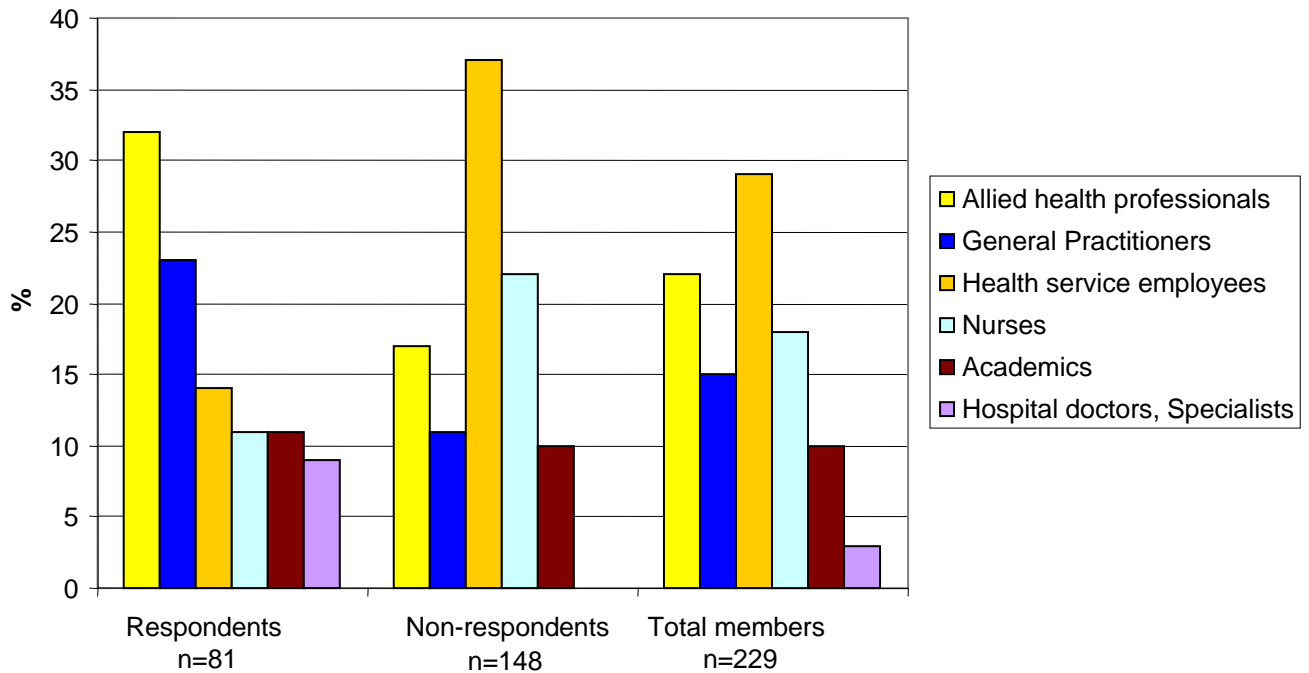

### b) Variation in response rates

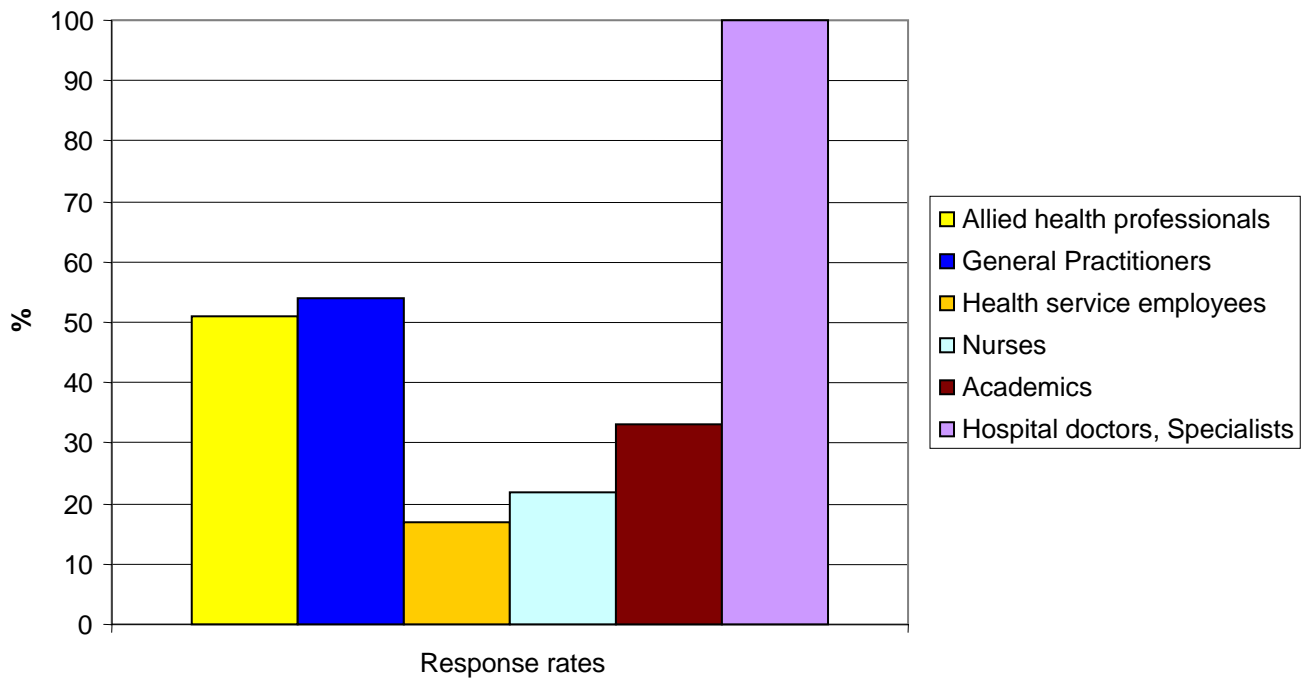

Supplement: MOESM3 [file 9436514]
